# Supplementary material for: Meat Consumption as a Risk Factor for Type 2 Diabetes
Source: MDPI journal article supplement (doi:10.3390/nu6020897), 2014-02-21
Supplement: s1 [file s1]

*Correction*

## **Correction: Barnard, N., *et al.* Meat Consumption as a Risk Factor for Type 2 Diabetes. *Nutrients* 2014, 6, 897–910**

Neal Barnard <sup>1</sup>, Susan Levin <sup>2,\*</sup> and Caroline Trapp <sup>2</sup>

<sup>1</sup> Physicians Committee for Responsible Medicine, The George Washington University School of Medicine, 5100 Wisconsin Ave NW, Washington, DC 20016, USA; E-Mail: nbarnard@pcrm.org

<sup>2</sup> Nutrition Education, Physicians Committee for Responsible Medicine, 5100 Wisconsin Ave NW, Washington, DC 20016, USA; E-Mail: ctrapp@pcrm.org

\* Author to whom correspondence should be addressed; E-Mail: slevin@pcrm.org; Tel.: +1-202-527-7333; Fax: +1-202-527-7433.

*Received: 6 March 2014 / Accepted: 17 March 2014 / Published: 21 March 2014*

---

We have found two inadvertent errors in our paper published in *Nutrients* [1].

On page 909, reference number 38, the first author should read “Ley” and not “Lev”. Additionally, the year cited should read “2014” and not “2010”. The final reference should read:

38. Ley, S.H.; Sun, Q.; Willett, W.C.; Eliassen, A.H.; Wu, K.; Pan, A.; Grodstein, F.; Hu, F.B. Associations between red meat intake and biomarkers of inflammation and glucose metabolism in women. *Am. J. Clin. Nutr.* **2014**, *99*, 352–360.

These changes have no material impact on the conclusions of our paper. We apologize to our readers.

### **Reference**

1. Barnard, N.; Levin, S.; Trapp, C. Meat Consumption as a Risk Factor for Type 2 Diabetes. *Nutrients* **2014**, *6*, 897–910.

© 2014 by the authors; licensee MDPI, Basel, Switzerland. This article is an open access article distributed under the terms and conditions of the Creative Commons Attribution license (<http://creativecommons.org/licenses/by/3.0/>).
